# Supplementary material for: Identification of Novel 1,3,5-Triphenylbenzene Derivative Compounds as Inhibitors of Hen Lysozyme Amyloid Fibril Formation
Source: MDPI journal article supplement (doi:10.3390/ijms20225558), 2019-11-07
Supplement: s1 [file s1]

# Electronic Supporting Information

**Compound 1:** 1,3,5-Triphenylbenzene

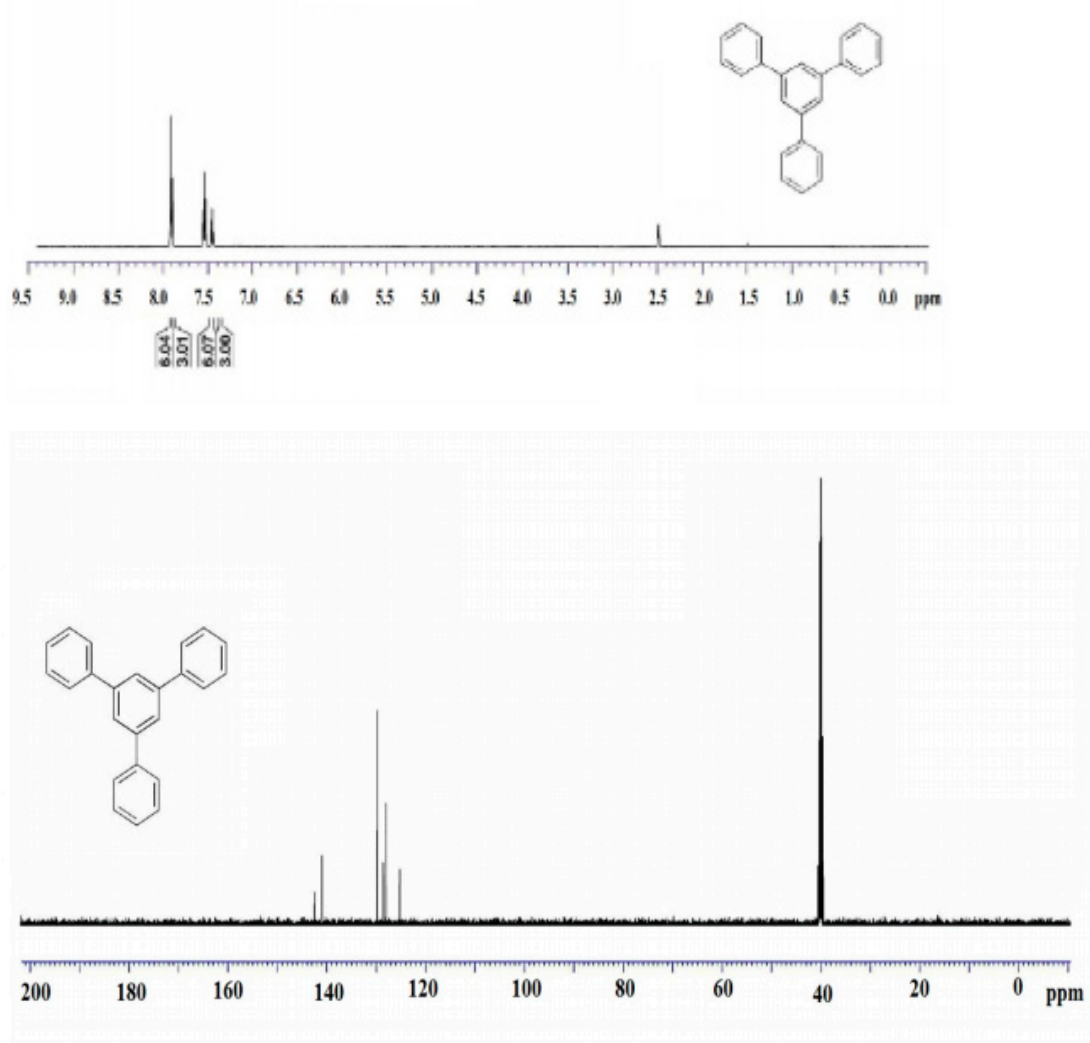

**Figure S1.** <sup>1</sup>H NMR spectrum (top) and <sup>13</sup>C NMR spectrum (bottom) of **Compound 1**.

Compound 2: 1,3,5-Tris(4-fluorophenyl)benzene

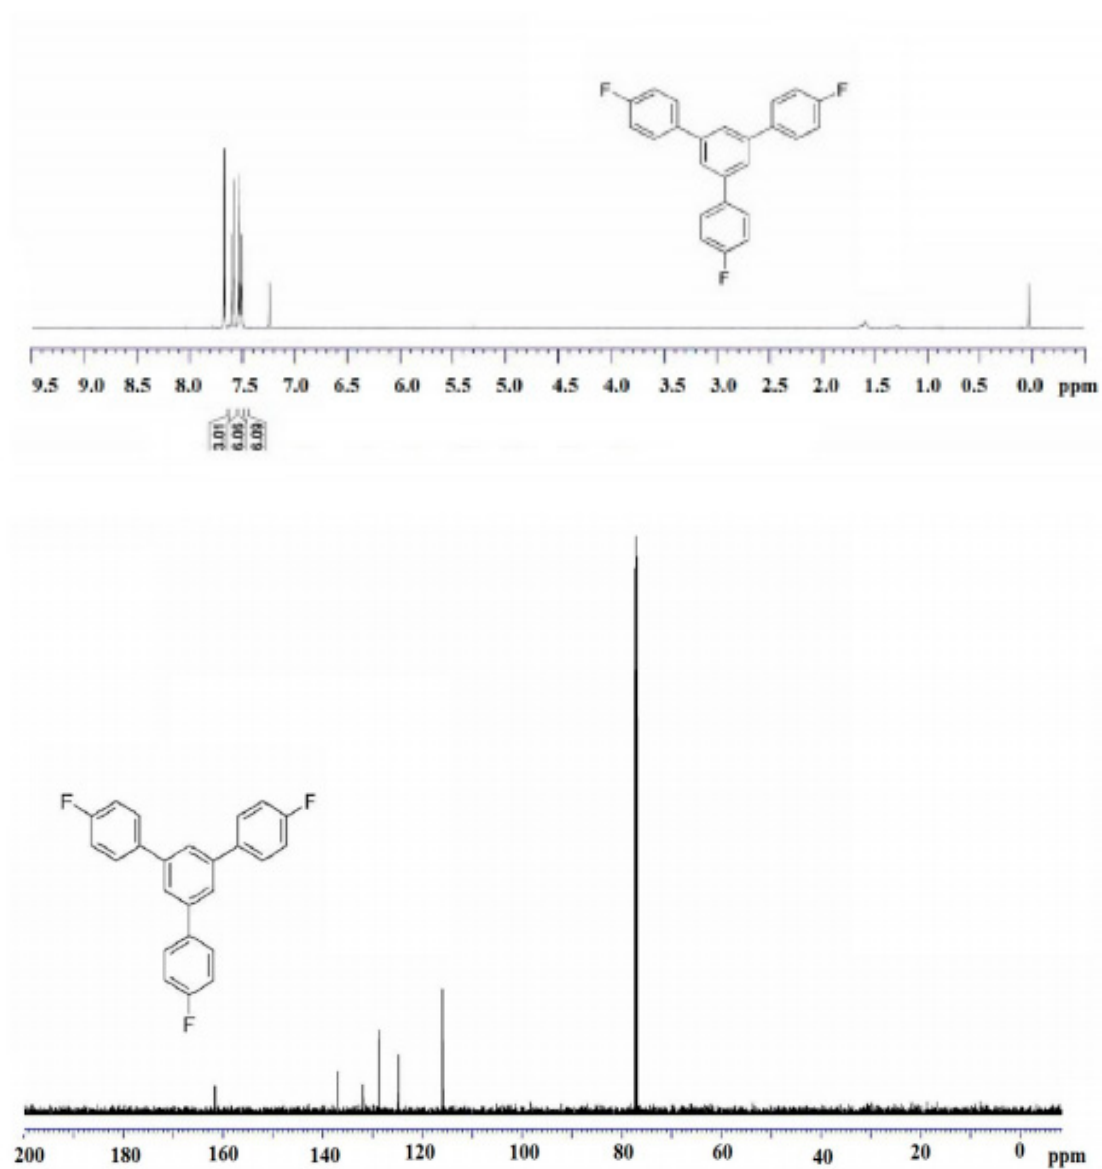

Figure S2.  $^1\text{H}$  NMR spectrum (top) and  $^{13}\text{C}$  NMR spectrum (bottom) of Compound 2.

Compound 3: 1,3,5-Tris(4-nitrophenyl)benzene

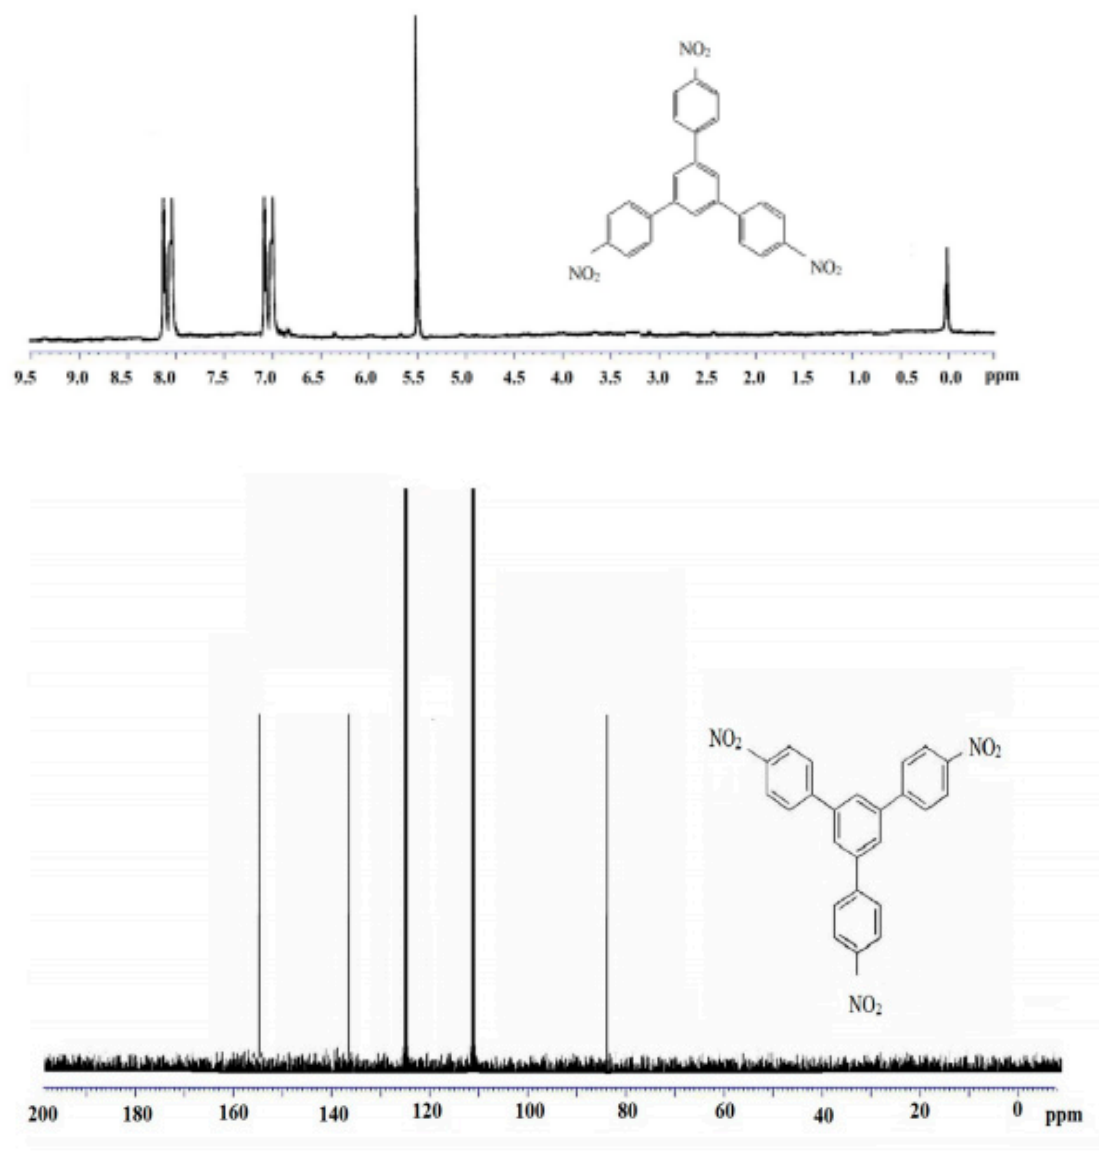

Figure S3. <sup>1</sup>H NMR spectrum (top) and <sup>13</sup>C NMR spectrum (bottom) of Compound 3.

Compound 4: 1,3,5-Tris(4-methylphenyl)benzene

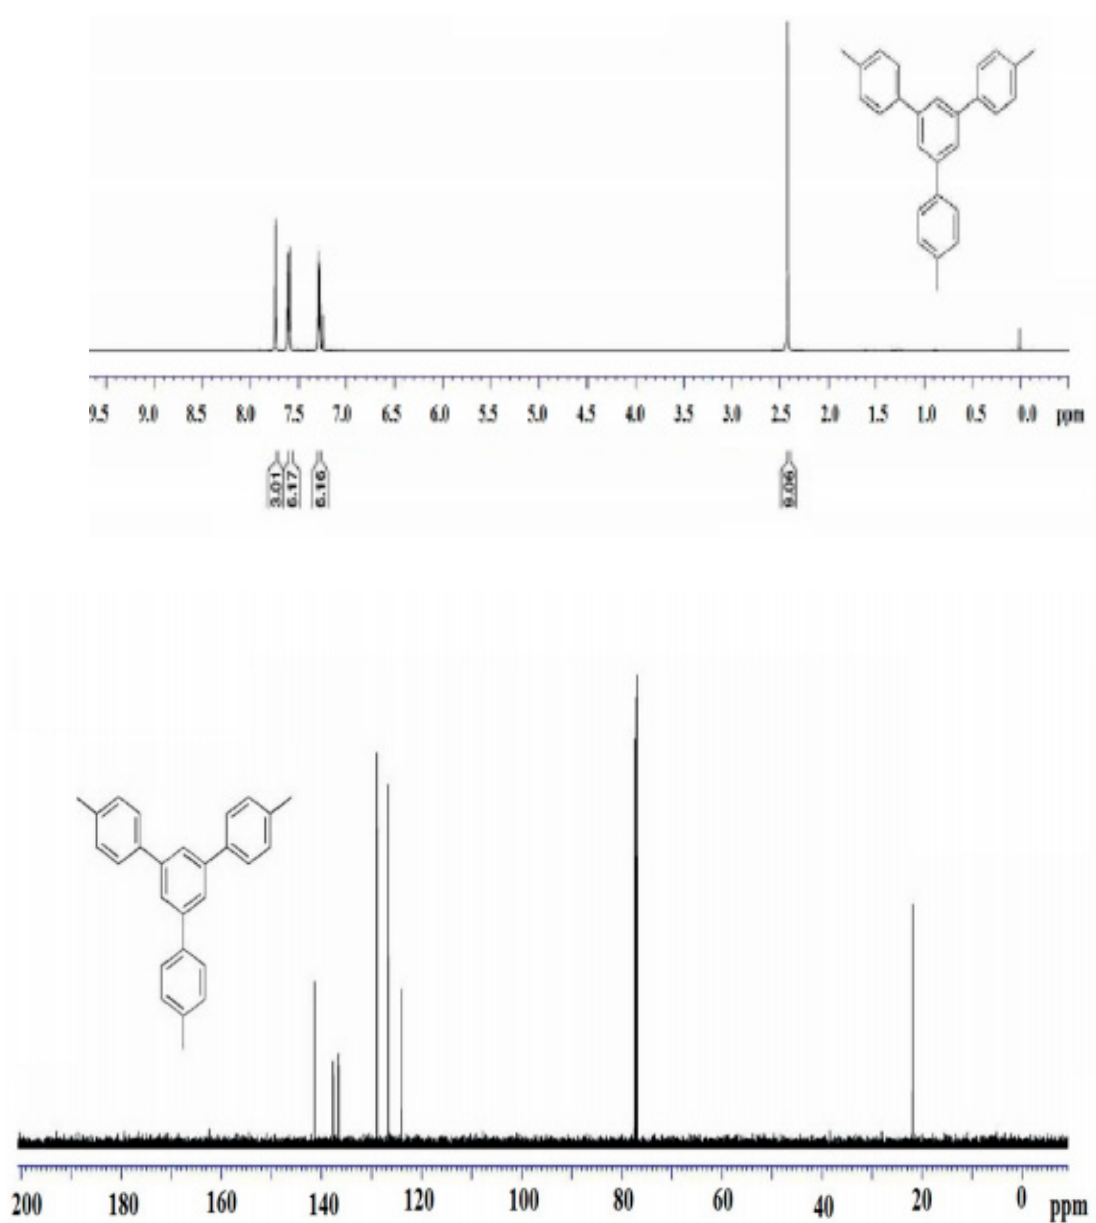

Figure S4. <sup>1</sup>H NMR spectrum (top) and <sup>13</sup>C NMR spectrum (bottom) of Compound 4.

Compound 5: 1,3,5-Tris(4-methoxyphenyl)benzene

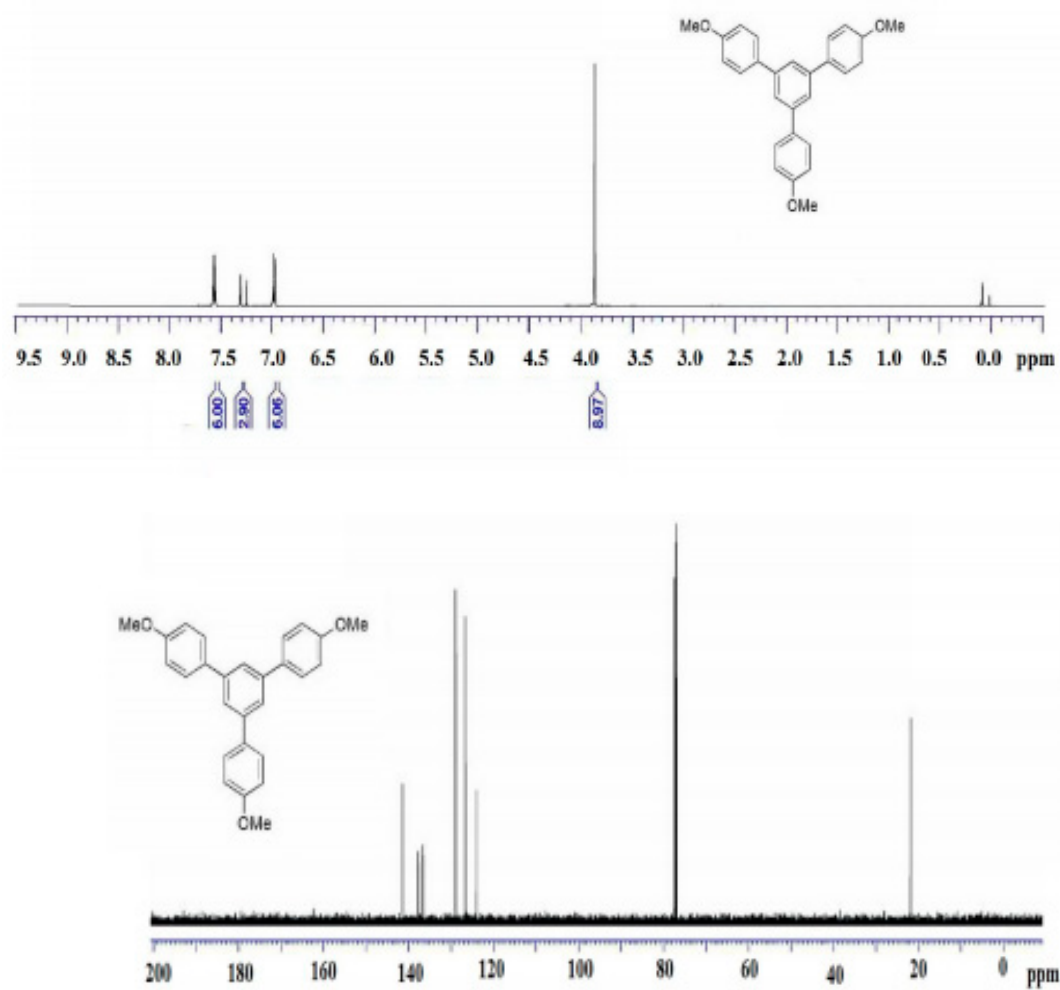

Figure S5.  $^1\text{H}$  NMR spectrum (top) and  $^{13}\text{C}$  NMR spectrum (bottom) of Compound 5.

Compound 6: 1,3,5-Tris(4-hydroxyphenyl)benzene

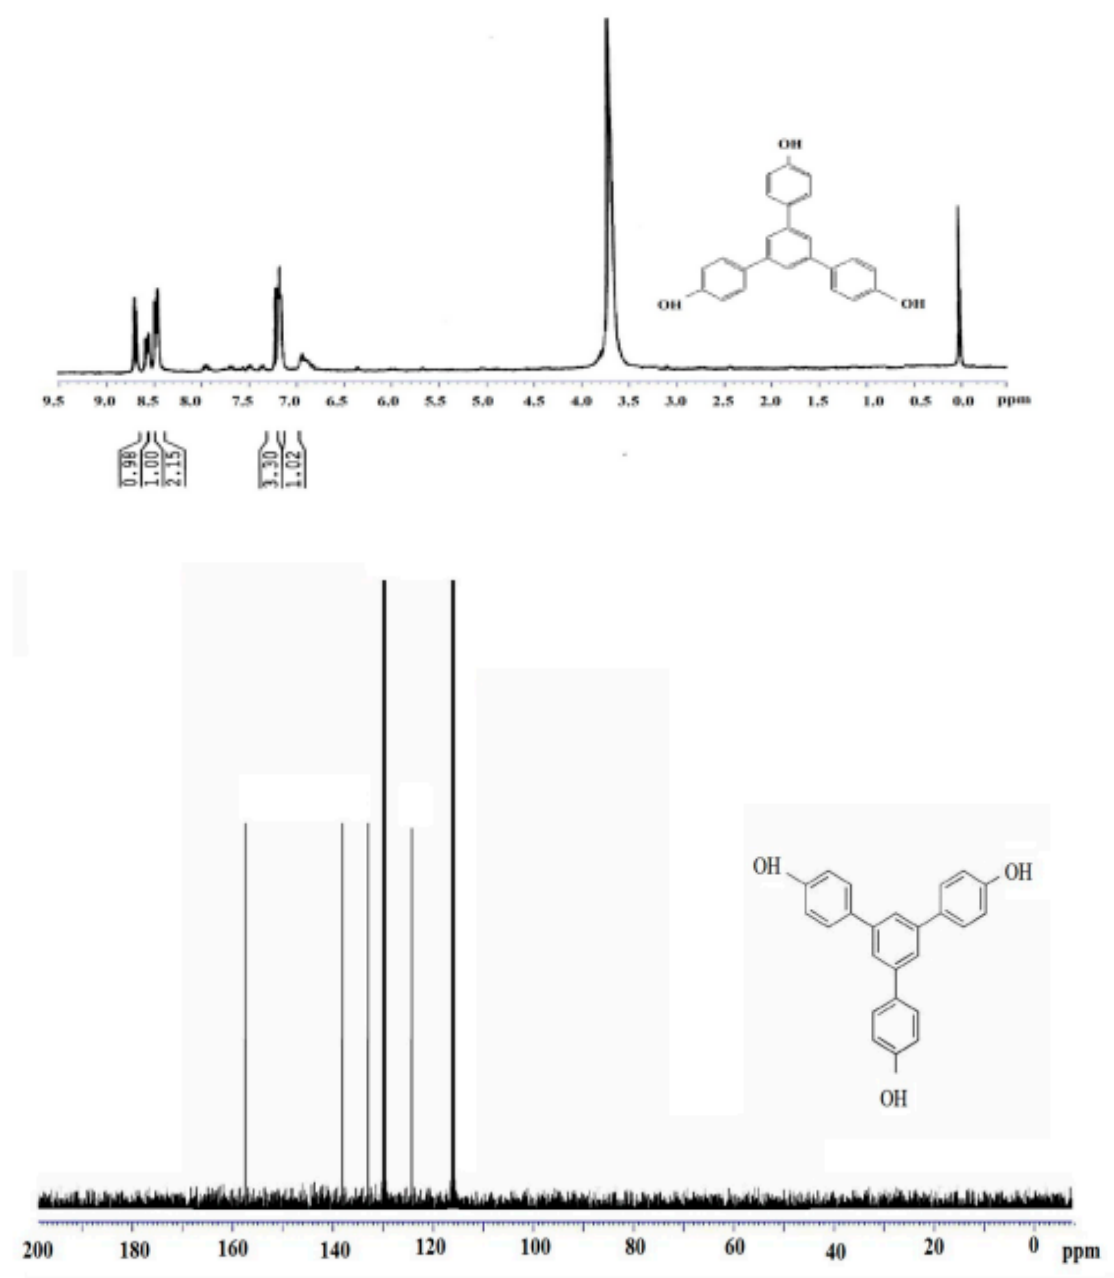

Figure S6. <sup>1</sup>H NMR spectrum (top) and <sup>13</sup>C NMR spectrum (bottom) of Compound 6.

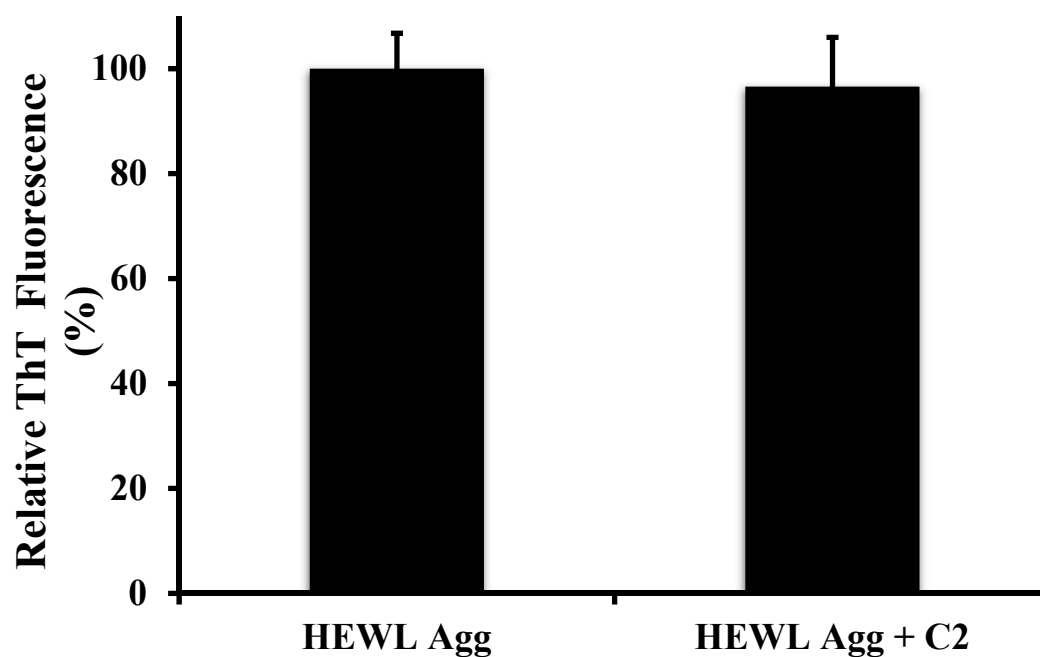

**Figure S7.** Study of the quenching activity of ThT fluorescence by compound 2. HEWL aggregates were obtained after 48 h incubation at pH 2.5 and 57 °C under stirring (250 rpm) and immediately monitored by the ThT fluorescence assay before and after adding compound 2 at a final concentration of 0.32  $\mu\text{M}$ .

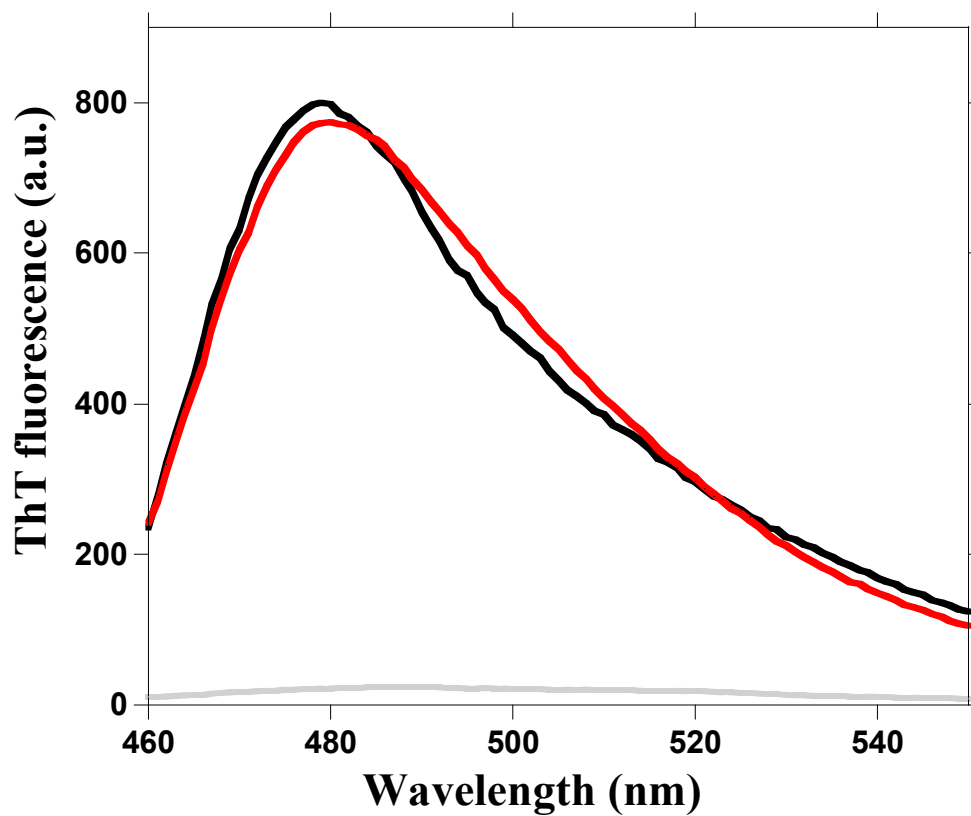

**Figure S8.** Effect of DMSO, at a concentration of 2% (*v/v*), on HEWL aggregation at 2 mg/ml, in 50 mM glycine buffer, pH 2.5, 57 °C, under stirring (250 rpm), after 48 h incubation monitored by changes in ThT fluorescence intensity. The spectra refer to ThT alone (gray), HEWL pre-incubated with 0 % (black) and 2% (*v/v*) DMSO (red).
